# Supplementary material for: An all-atom molecular dynamics study of the anti-interferon signaling of Ebola virus: interaction mechanisms of EBOV VP24 binding to Karyopherin alpha5
Source: Royal Society of Chemistry journal article supplement (doi:10.1039/c7mb00136c), 2017-04-18
Supplement: c7mb00136c1.pdf [file c7mb00136c1.pdf]

Supplemental Table 1. Decomposition of binding free energies on each residue of WT system.

| Residue | S <sub>vdw</sub> | B <sub>vdw</sub> | T <sub>vdw</sub> | S <sub>ele</sub> | B <sub>ele</sub> | T <sub>ele</sub> | S <sub>polor</sub> | B <sub>polor</sub> | T <sub>polor</sub> | T <sub>nonpolor</sub> | T <sub>GBTOT</sub> |
|---------|------------------|------------------|------------------|------------------|------------------|------------------|--------------------|--------------------|--------------------|-----------------------|--------------------|
| WT      |                  |                  |                  |                  |                  |                  |                    |                    |                    |                       |                    |
| 105     | 0                | -0.66            | -0.66            | 0                | -2.37            | -2.37            | 0                  | 1.95               | 1.95               | -0.07                 | -1.15              |
| 106     | -2.5             | -1.24            | -3.74            | -5.3             | 4.31             | -0.99            | 5.33               | -3.82              | 1.51               | -0.37                 | -3.6               |
| 110     | -0.54            | -0.77            | -1.31            | -2.7             | 1.63             | -1.07            | 2.9                | -1.47              | 1.43               | -0.07                 | -1.02              |
| 113     | -1.81            | -0.71            | -2.52            | -1.17            | 3.87             | 2.7              | 2.1                | -3.41              | -1.31              | -0.47                 | -1.6               |
| 114     | -0.82            | -0.29            | -1.11            | -4.49            | 1.91             | -2.59            | 4.79               | -1.71              | 3.09               | -0.24                 | -0.85              |
| 119     | -1               | -0.13            | -1.12            | -2.29            | -3.09            | -5.38            | 2.51               | 3.06               | 5.57               | -0.11                 | -1.05              |
| 121     | -0.44            | -0.63            | -1.07            | -4.88            | -1.44            | -6.31            | 4.78               | -0.46              | 4.32               | -0.01                 | -3.07              |
| 122     | -2.59            | -0.43            | -3.03            | -160.77          | -3.93            | -164.7           | 148.2              | 0.9                | 149.13             | -1.15                 | -19.75             |
| 123     | -1.77            | -0.34            | -2.11            | -13.86           | -0.65            | -14.51           | 12.08              | -1.33              | 10.76              | -0.51                 | -6.37              |
| 125     | -2.21            | -0.22            | -2.43            | -98.06           | -0.59            | -98.65           | 93.36              | 0.74               | 94.1               | -0.65                 | -7.63              |
| 126     | -0.85            | -0.16            | -1.01            | -7.09            | 3.96             | -3.14            | 7.03               | -3.88              | 3.16               | -0.07                 | -1.06              |
| 169     | -2               | -1.44            | -3.45            | -7.56            | -0.91            | -8.47            | 7.22               | 2.48               | 9.7                | -0.76                 | -2.97              |
| 170     | -1.85            | -1.32            | -3.17            | -0.67            | -2.75            | -3.42            | 2.56               | 2.23               | 4.79               | -0.47                 | -2.27              |
| 186     | -0.82            | -0.2             | -1.03            | -2.43            | 2.54             | 0.11             | 2.43               | -2.43              | 0.01               | -0.15                 | -1.06              |
| 189     | -2.26            | -0.89            | -3.14            | -3.09            | 1.87             | -1.22            | 3.05               | -1.48              | 1.57               | -0.34                 | -3.14              |
| 203     | -0.22            | -0.07            | -0.29            | -55.27           | 0.34             | -54.93           | 54.23              | -0.33              | 53.9               | -0.16                 | -1.49              |
| 277     | -3.29            | -0.77            | -4.06            | -1.59            | -2.12            | -3.72            | 1.71               | 2.19               | 3.9                | -0.53                 | -4.4               |
| 278     | -0.66            | -0.23            | -0.9             | -35.71           | -0.49            | -36.2            | 32.41              | 0.59               | 33                 | -0.31                 | -4.41              |
| 280     | -0.6             | -0.07            | -0.67            | -24.55           | -0.89            | -25.44           | 22.86              | 0.9                | 23.76              | -0.18                 | -2.54              |
| 309     | 0.1              | -0.04            | 0.06             | -19.91           | 0.36             | -19.55           | 17.76              | -0.31              | 17.46              | -0.18                 | -2.22              |
| 316     | -0.67            | -1.04            | -1.71            | -5.75            | 0.81             | -4.93            | 5.84               | -0.08              | 5.76               | -0.31                 | -1.2               |
| 317     | -1.56            | -1.19            | -2.74            | -2.92            | -0.47            | -3.39            | 2.76               | 0.49               | 3.25               | -0.29                 | -3.17              |
| 318     | -4.71            | -1.57            | -6.28            | -1.49            | -1.28            | -2.77            | 2.09               | 1.31               | 3.39               | -1.15                 | -6.81              |
| 319     | -1.11            | -1.12            | -2.23            | 18.69            | -0.89            | 17.8             | -16.71             | 0.21               | -16.5              | -0.18                 | -1.11              |
| 320     | 0.21             | -0.1             | 0.11             | -6.82            | -3.86            | -10.69           | 6.2                | 2.61               | 8.82               | -0.23                 | -2                 |
| 354     | -0.8             | -1.34            | -2.13            | -45.7            | -3               | -48.69           | 45.06              | 3.91               | 48.97              | -0.54                 | -2.39              |
| 357     | -4.29            | -0.99            | -5.28            | -7.6             | 0.75             | -6.85            | 7.27               | -0.71              | 6.57               | -0.83                 | -6.39              |
| 359     | -1.2             | -0.66            | -1.86            | 2.89             | -3.2             | -0.3             | -2.79              | 3.23               | 0.44               | -0.26                 | -1.98              |
| 361     | -0.64            | -0.4             | -1.04            | -30.42           | 0.6              | -29.82           | 25.97              | -0.37              | 25.59              | -0.04                 | -5.31              |
| 364     | -4.84            | -0.5             | -5.34            | -0.36            | -0.82            | -1.18            | 1.97               | 0.99               | 2.96               | -0.93                 | -4.49              |
| 385     | -1.15            | -0.18            | -1.33            | 0.07             | 2.35             | 2.41             | -0.02              | -2.03              | -2.05              | -0.09                 | -1.05              |
| 386     | 0                | 0.47             | 0.47             | 0                | -61.07           | -61.07           | 0                  | 58.56              | 58.56              | -0.2                  | -2.24              |

Supplemental Table 2. Decomposition of binding free energies on each residue of MUT1 system.

| Residue | S <sub>vdw</sub> | B <sub>vdw</sub> | T <sub>vdw</sub> | S <sub>ele</sub> | B <sub>ele</sub> | T <sub>ele</sub> | S <sub>polor</sub> | B <sub>polor</sub> | T <sub>polor</sub> | T <sub>nonpolor</sub> | T <sub>GBTOT</sub> |
|---------|------------------|------------------|------------------|------------------|------------------|------------------|--------------------|--------------------|--------------------|-----------------------|--------------------|
| MUT1    |                  |                  |                  |                  |                  |                  |                    |                    |                    |                       |                    |
| 105     | 0                | -0.82            | -0.82            | 0                | -2.59            | -2.59            | 0                  | 2.16               | 2.16               | -0.09                 | -1.33              |
| 106     | -2.22            | -1.43            | -3.64            | -5.18            | 4.1              | -1.09            | 5.18               | -3.41              | 1.77               | -0.32                 | -3.28              |
| 110     | -0.72            | -0.98            | -1.7             | -2.98            | 1.73             | -1.26            | 3.17               | -1.6               | 1.57               | -0.12                 | -1.5               |
| 113     | -1.85            | -1.02            | -2.87            | -3.36            | 4.21             | 0.85             | 4.13               | -3.36              | 0.77               | -0.49                 | -1.74              |
| 114     | -1.35            | -0.73            | -2.09            | -5.19            | 1.64             | -3.55            | 5.57               | -1.43              | 4.14               | -0.35                 | -1.85              |
| 121     | -0.34            | -0.53            | -0.88            | 0.67             | -11.34           | -10.67           | -0.55              | 8.9                | 8.35               | -0.09                 | -3.29              |
| 122     | -3.48            | -0.59            | -4.07            | -153.08          | -3.93            | -157.01          | 142.78             | 1.01               | 143.8              | -1.09                 | -18.37             |
| 123     | -1.64            | -0.49            | -2.14            | -14.09           | -0.83            | -14.93           | 12.48              | -1.23              | 11.26              | -0.52                 | -6.32              |
| 125     | -2.05            | -0.5             | -2.54            | -88.85           | -0.5             | -89.35           | 84.03              | 0.58               | 84.61              | -0.58                 | -7.87              |
| 126     | -1.32            | -0.27            | -1.6             | -7.33            | 4.3              | -3.03            | 7.25               | -4.19              | 3.06               | -0.12                 | -1.69              |
| 169     | -2.23            | -1.59            | -3.82            | -6.38            | -0.42            | -6.8             | 5.84               | 2.14               | 7.98               | -0.92                 | -3.57              |
| 170     | -2.57            | -1.39            | -3.96            | -2.82            | -3.36            | -6.18            | 3.94               | 2.34               | 6.28               | -0.61                 | -4.47              |
| 186     | -0.88            | -0.37            | -1.25            | -2.76            | 2.85             | 0.09             | 2.77               | -2.7               | 0.06               | -0.15                 | -1.25              |
| 189     | -2.45            | -0.94            | -3.39            | -3.43            | 1.58             | -1.84            | 3.59               | -1.39              | 2.2                | -0.37                 | -3.4               |
| 201     | -0.75            | -0.32            | -1.07            | -6.8             | 4.1              | -2.7             | 6.63               | -3.75              | 2.88               | -0.23                 | -1.11              |
| 203     | -0.54            | -0.17            | -0.7             | -64.38           | 0.37             | -64.01           | 62.89              | -0.35              | 62.54              | -0.26                 | -2.44              |
| 277     | -3.21            | -0.8             | -4.01            | -0.99            | -0.99            | -1.98            | 1.29               | 1.33               | 2.62               | -0.5                  | -3.87              |
| 278     | -0.89            | -0.21            | -1.1             | -29.03           | -0.22            | -29.25           | 27.18              | 0.3                | 27.48              | -0.29                 | -3.16              |
| 280     | -0.29            | -0.08            | -0.37            | -26.55           | -0.6             | -27.15           | 23.31              | 0.62               | 23.93              | -0.17                 | -3.76              |
| 309     | 0.26             | -0.05            | 0.21             | -27.43           | 0.31             | -27.13           | 23.47              | -0.25              | 23.22              | -0.21                 | -3.91              |
| 314     | -0.87            | -0.38            | -1.25            | -1.34            | 1.12             | -0.21            | 1.38               | -1.14              | 0.23               | -0.09                 | -1.32              |
| 316     | -1.04            | -1.1             | -2.14            | -5.23            | -1.3             | -6.53            | 5.48               | 1                  | 6.48               | -0.42                 | -2.62              |
| 317     | -1.34            | -1.32            | -2.66            | -2.8             | -1.02            | -3.82            | 2.59               | 1.21               | 3.8                | -0.19                 | -2.87              |
| 318     | -5.28            | -1.57            | -6.85            | -1.71            | -1.75            | -3.47            | 2.45               | 1.89               | 4.33               | -1.18                 | -7.16              |
| 319     | -1.07            | -1.26            | -2.33            | 19.17            | -1.7             | 17.48            | -17.15             | 0.79               | -16.36             | -0.19                 | -1.4               |
| 320     | 0.06             | -0.18            | -0.12            | -6.72            | -4.12            | -10.84           | 6.17               | 2.79               | 8.96               | -0.24                 | -2.24              |
| 354     | -1.34            | -1.29            | -2.64            | -38.46           | -2.53            | -40.99           | 39.19              | 3.76               | 42.95              | -0.49                 | -1.17              |
| 357     | -4.36            | -0.97            | -5.34            | -7.46            | -0.06            | -7.52            | 7.04               | 0.11               | 7.15               | -0.74                 | -6.45              |
| 359     | -1.8             | -0.48            | -2.28            | 2.95             | -10.47           | -7.53            | -2.79              | 8.21               | 5.42               | -0.28                 | -4.67              |
| 360     | -1.01            | -1.07            | -2.09            | -71.75           | -6.69            | -78.44           | 72.17              | 6.85               | 79.03              | -0.51                 | -2.01              |
| 361     | -0.65            | -0.43            | -1.07            | -28.55           | 0.44             | -28.12           | 24.35              | -0.27              | 24.08              | -0.03                 | -5.13              |
| 363     | 0.26             | -0.35            | -0.1             | -60.77           | -2.11            | -62.89           | 58.9               | 2.26               | 61.16              | -0.21                 | -2.03              |
| 364     | -4.99            | -1.25            | -6.25            | -0.28            | -0.09            | -0.37            | 1.55               | 0.74               | 2.28               | -0.89                 | -5.23              |
| 385     | -0.96            | -0.31            | -1.27            | 0.17             | -1.51            | -1.34            | -0.09              | 1.75               | 1.66               | -0.16                 | -1.11              |

Supplemental Table 3. Decomposition of binding free energies on each residue of MUT2 system.

| Residue | S <sub>vdw</sub> | B <sub>vdw</sub> | T <sub>vdw</sub> | S <sub>ele</sub> | B <sub>ele</sub> | T <sub>ele</sub> | S <sub>polor</sub> | B <sub>polor</sub> | T <sub>polor</sub> | T <sub>nonpolor</sub> | T <sub>GBTOT</sub> |
|---------|------------------|------------------|------------------|------------------|------------------|------------------|--------------------|--------------------|--------------------|-----------------------|--------------------|
| MUT2    |                  |                  |                  |                  |                  |                  |                    |                    |                    |                       |                    |
| 106     | -2.43            | -0.63            | -3.06            | -5.27            | 4.59             | -0.68            | 5.3                | -4.31              | 0.99               | -0.39                 | -3.14              |
| 113     | -0.84            | -0.97            | -1.81            | 0.17             | 0.73             | 0.9              | -0.15              | 0                  | -0.14              | -0.35                 | -1.4               |
| 114     | -0.73            | -0.99            | -1.71            | -0.03            | -4.18            | -4.21            | 0.06               | 3.72               | 3.78               | -0.24                 | -2.39              |
| 115     | -0.66            | -0.75            | -1.41            | -0.51            | -4.25            | -4.76            | 0.83               | 3.47               | 4.29               | -0.24                 | -2.12              |
| 116     | -0.44            | -0.62            | -1.07            | -0.1             | -2.67            | -2.76            | 0.11               | 2.41               | 2.52               | -0.19                 | -1.51              |
| 119     | -1.56            | -0.25            | -1.81            | -3.01            | -4.01            | -7.02            | 3.05               | 3.89               | 6.95               | -0.21                 | -2.09              |
| 121     | -0.53            | -0.75            | -1.27            | -5.84            | -4.3             | -10.14           | 5.6                | 1.52               | 7.12               | 0                     | -4.3               |
| 122     | -3.1             | -0.88            | -3.98            | -152.64          | -0.04            | -152.67          | 144.71             | -2.32              | 142.39             | -1.06                 | -15.32             |
| 123     | -1.34            | -0.75            | -2.09            | -13.5            | -1.9             | -15.41           | 11.76              | -0.25              | 11.51              | -0.46                 | -6.45              |
| 124     | -0.48            | -0.43            | -0.91            | -11.05           | -1.66            | -12.71           | 9.7                | 1.76               | 11.46              | -0.19                 | -2.34              |
| 125     | -1.39            | -0.3             | -1.69            | -62.74           | -0.65            | -63.4            | 62                 | 0.81               | 62.81              | -0.4                  | -2.67              |
| 169     | -1.06            | -0.81            | -1.86            | -6.76            | -0.97            | -7.73            | 6.8                | 1.73               | 8.53               | -0.53                 | -1.59              |
| 170     | -1.78            | -1.03            | -2.81            | -3.41            | -2.27            | -5.68            | 3.67               | 2.65               | 6.32               | -0.57                 | -2.74              |
| 188     | -1.06            | -0.58            | -1.64            | -26.01           | 2.74             | -23.27           | 25.5               | -2.42              | 23.08              | -0.49                 | -2.32              |
| 189     | -1.18            | -0.82            | -2.01            | -0.53            | 1.29             | 0.76             | 0.6                | -0.96              | -0.36              | -0.29                 | -1.9               |
| 190     | -0.69            | -0.69            | -1.38            | -27.25           | -0.04            | -27.29           | 26.55              | 0.41               | 26.96              | -0.44                 | -2.15              |
| 201     | -0.97            | -0.26            | -1.23            | -3.32            | 0.88             | -2.44            | 3.29               | -0.68              | 2.61               | -0.3                  | -1.36              |
| 203     | -0.07            | -0.06            | -0.13            | -67              | 0.19             | -66.81           | 64.29              | -0.17              | 64.12              | -0.2                  | -3.02              |
| 277     | -3.14            | -0.55            | -3.69            | -0.6             | 0.04             | -0.56            | 1.17               | 0.2                | 1.37               | -0.71                 | -3.59              |
| 278     | -0.52            | -0.42            | -0.94            | -39.64           | 0.54             | -39.09           | 33.04              | -0.38              | 32.66              | -0.46                 | -7.83              |
| 280     | -0.51            | -0.07            | -0.59            | -22.73           | -0.93            | -23.66           | 21.88              | 0.97               | 22.84              | -0.19                 | -1.59              |
| 281     | -0.3             | -0.1             | -0.39            | -38.47           | -0.57            | -39.03           | 34.77              | 0.6                | 35.37              | -0.21                 | -4.26              |
| 316     | -1.14            | -1               | -2.14            | -3.49            | -2.24            | -5.73            | 3.98               | 1.41               | 5.38               | -0.44                 | -2.93              |
| 317     | -0.78            | -1.01            | -1.79            | -2.39            | -1.29            | -3.68            | 2.3                | 1.97               | 4.27               | -0.17                 | -1.38              |
| 318     | -4.15            | -1.24            | -5.39            | -2.29            | -1.64            | -3.93            | 2.97               | 2.53               | 5.49               | -1.1                  | -4.94              |
| 357     | -3.84            | -0.88            | -4.72            | -2.16            | 0.45             | -1.71            | 3.95               | -0.66              | 3.29               | -0.85                 | -3.99              |
| 359     | -1.21            | -0.68            | -1.89            | 3.12             | -2.86            | 0.26             | -2.95              | 3.1                | 0.15               | -0.21                 | -1.69              |
| 360     | -1.47            | -1.1             | -2.57            | -67.08           | -5.5             | -72.58           | 68.78              | 5.51               | 74.29              | -0.57                 | -1.43              |
| 361     | -1.13            | -0.33            | -1.46            | -16.37           | 0.46             | -15.91           | 15.3               | -0.28              | 15.03              | -0.17                 | -2.51              |
| 363     | -0.31            | -0.32            | -0.64            | -67.51           | -2.81            | -70.31           | 66.81              | 2.94               | 69.75              | -0.4                  | -1.6               |
| 364     | -4.79            | -0.89            | -5.68            | -0.69            | -1.57            | -2.26            | 1.76               | 1.96               | 3.73               | -0.89                 | -5.11              |
| 367     | -1.33            | -0.84            | -2.17            | -1.26            | -2.21            | -3.47            | 0.25               | 2.74               | 2.99               | -0.52                 | -3.17              |

Supplemental Table 4. Decomposition of binding free energies on each residue of MUT3 system.

| Residue | S <sub>vdw</sub> | B <sub>vdw</sub> | T <sub>vdw</sub> | S <sub>ele</sub> | B <sub>ele</sub> | T <sub>ele</sub> | S <sub>polor</sub> | B <sub>polor</sub> | T <sub>polor</sub> | T <sub>nonpolor</sub> | T <sub>GBTOT</sub> |
|---------|------------------|------------------|------------------|------------------|------------------|------------------|--------------------|--------------------|--------------------|-----------------------|--------------------|
| MUT3    |                  |                  |                  |                  |                  |                  |                    |                    |                    |                       |                    |
| 102     | 0                | -1.17            | -1.17            | 0                | -2.49            | -2.49            | 0                  | 2.32               | 2.32               | -0.19                 | -1.54              |
| 103     | -0.26            | -0.7             | -0.95            | 0.08             | -0.5             | -0.42            | -0.01              | 0.42               | 0.41               | -0.06                 | -1.02              |
| 106     | -3.27            | -0.62            | -3.89            | -4.55            | 3.04             | -1.51            | 4.65               | -2.88              | 1.77               | -0.67                 | -4.3               |
| 121     | -0.85            | -0.3             | -1.16            | -4.73            | -0.61            | -5.34            | 4.83               | 0.43               | 5.26               | -0.12                 | -1.36              |
| 125     | -1.73            | -0.13            | -1.86            | -98.01           | 1.12             | -96.89           | 95                 | -1.01              | 93.99              | -0.65                 | -5.4               |
| 168     | -0.39            | -1.55            | -1.95            | -0.86            | -0.84            | -1.71            | 0.84               | 1.86               | 2.7                | -0.15                 | -1.11              |
| 169     | -4.2             | -2.08            | -6.28            | -7.45            | -1.52            | -8.96            | 9.16               | 2.7                | 11.86              | -1.18                 | -4.57              |
| 170     | -2               | -1.12            | -3.12            | -5.68            | -1.19            | -6.87            | 6.33               | 1.94               | 8.27               | -0.56                 | -2.28              |
| 189     | -1.51            | -0.96            | -2.47            | 1.42             | -1.51            | -0.09            | -1.01              | 2.13               | 1.12               | -0.43                 | -1.86              |
| 277     | -3.73            | -1.23            | -4.96            | -1.24            | -0.45            | -1.69            | 1.6                | 0.89               | 2.49               | -0.65                 | -4.8               |
| 278     | -1.51            | -0.57            | -2.08            | -40.9            | 0.56             | -40.34           | 37.81              | -0.5               | 37.31              | -0.5                  | -5.62              |
| 280     | -1.39            | -0.53            | -1.92            | -28.03           | -0.36            | -28.39           | 27.01              | 0.55               | 27.56              | -0.21                 | -2.95              |
| 281     | -1.74            | -0.6             | -2.34            | -32.6            | -0.19            | -32.8            | 33.26              | 0.28               | 33.54              | -0.51                 | -2.11              |
| 309     | 0.08             | -0.05            | 0.03             | -34.06           | 0.16             | -33.9            | 31.01              | -0.09              | 30.92              | -0.28                 | -3.23              |
| 316     | -0.48            | -0.84            | -1.32            | -6.22            | 2.3              | -3.92            | 5.79               | -1.49              | 4.31               | -0.32                 | -1.25              |
| 317     | -1               | -0.83            | -1.83            | -2.85            | -0.16            | -3.01            | 2.67               | 0.11               | 2.78               | -0.28                 | -2.34              |
| 318     | -3.51            | -0.44            | -3.96            | -2.13            | -2.29            | -4.42            | 2.62               | 1.43               | 4.05               | -0.95                 | -5.28              |
| 357     | -4.83            | -0.38            | -5.21            | 0.53             | 2.52             | 3.04             | 2.24               | -2.22              | 0.02               | -0.94                 | -3.09              |
| 364     | -3.65            | -0.35            | -4               | -0.26            | -0.5             | -0.76            | 1.3                | 0.66               | 1.96               | -0.82                 | -3.62              |

Supplemental Table 5. Decomposition of binding free energies on each residue of MUT4 system.

| Residue | S <sub>vdw</sub> | B <sub>vdw</sub> | T <sub>vdw</sub> | S <sub>ele</sub> | B <sub>ele</sub> | T <sub>ele</sub> | S <sub>polor</sub> | B <sub>polor</sub> | T <sub>polor</sub> | T <sub>nonpolor</sub> | T <sub>GBTOT</sub> |
|---------|------------------|------------------|------------------|------------------|------------------|------------------|--------------------|--------------------|--------------------|-----------------------|--------------------|
| MUT4    |                  |                  |                  |                  |                  |                  |                    |                    |                    |                       |                    |
| 106     | -2.32            | -0.57            | -2.89            | -4.92            | 3.55             | -1.37            | 4.96               | -3.24              | 1.72               | -0.36                 | -2.91              |
| 110     | -0.93            | -0.9             | -1.83            | -3.74            | 1.53             | -2.21            | 3.94               | -1.5               | 2.44               | -0.1                  | -1.7               |
| 113     | -1.73            | -0.95            | -2.68            | -2.06            | 4.16             | 2.09             | 2.67               | -3.42              | -0.75              | -0.42                 | -1.76              |
| 114     | -1.73            | -0.66            | -2.39            | -4.71            | 1.11             | -3.6             | 4.97               | -0.89              | 4.09               | -0.34                 | -2.24              |
| 119     | -1.76            | -0.25            | -2.01            | -3.1             | -3.68            | -6.78            | 3.2                | 3.58               | 6.78               | -0.24                 | -2.26              |
| 121     | -0.55            | -0.66            | -1.21            | -5.68            | -4.74            | -10.42           | 5.4                | 1.85               | 7.25               | -0.01                 | -4.39              |
| 122     | -1.19            | -0.83            | -2.02            | 0.12             | -5.72            | -5.61            | 0.02               | 3.19               | 3.2                | -0.49                 | -4.91              |
| 123     | -1.25            | -0.79            | -2.04            | -13.27           | -2.2             | -15.48           | 11.44              | -0.05              | 11.38              | -0.4                  | -6.54              |
| 124     | -0.58            | -0.43            | -1.01            | -8.55            | -1.44            | -9.99            | 8.07               | 1.57               | 9.65               | -0.18                 | -1.53              |
| 125     | -2.34            | -0.25            | -2.6             | -66.66           | -0.7             | -67.36           | 64.97              | 0.81               | 65.77              | -0.53                 | -4.71              |
| 170     | -0.72            | -1.36            | -2.08            | -0.1             | -1.71            | -1.82            | 0.14               | 2.43               | 2.57               | -0.43                 | -1.76              |
| 188     | -1.12            | -0.56            | -1.68            | -21.03           | 2.15             | -18.88           | 21.93              | -1.97              | 19.96              | -0.53                 | -1.13              |
| 189     | -1.12            | -0.45            | -1.57            | -0.18            | 0.56             | 0.38             | 0.26               | -0.32              | -0.07              | -0.23                 | -1.48              |
| 201     | -1.18            | -0.52            | -1.71            | -3.41            | 0.63             | -2.78            | 3.47               | -0.36              | 3.11               | -0.3                  | -1.68              |
| 203     | -0.81            | -0.23            | -1.04            | -59.09           | -0.02            | -59.11           | 58.24              | 0.1                | 58.34              | -0.31                 | -2.12              |
| 277     | -3.31            | -0.36            | -3.67            | -1.36            | -0.86            | -2.22            | 1.64               | 1.11               | 2.74               | -0.61                 | -3.75              |
| 278     | -0.97            | -0.18            | -1.14            | -36.12           | -0.19            | -36.31           | 33.96              | 0.22               | 34.19              | -0.37                 | -3.64              |
| 281     | 0.33             | -0.05            | 0.29             | -42.5            | -0.65            | -43.15           | 37.1               | 0.67               | 37.76              | -0.14                 | -5.25              |
| 318     | -4.84            | -0.87            | -5.71            | -2.07            | -1.9             | -3.97            | 2.67               | 2.4                | 5.07               | -1.18                 | -5.78              |
| 355     | -0.8             | -0.68            | -1.48            | -10.16           | -7.36            | -17.52           | 10.99              | 5.4                | 16.39              | -0.34                 | -2.95              |
| 357     | -3.85            | -0.9             | -4.75            | -6.99            | 1.11             | -5.88            | 8.2                | -1.31              | 6.89               | -0.98                 | -4.71              |
| 359     | -0.75            | -0.56            | -1.31            | 1.44             | -1.38            | 0.06             | -1.38              | 1.63               | 0.25               | -0.15                 | -1.15              |
| 361     | -0.44            | -0.39            | -0.83            | -34.41           | 0.79             | -33.62           | 30.07              | -0.6               | 29.47              | -0.17                 | -5.15              |
| 364     | -5.64            | -1.22            | -6.86            | -1.67            | -0.69            | -2.36            | 2.56               | 1.19               | 3.75               | -0.95                 | -6.43              |

Supplemental Table 6. Decomposition of binding free energies on each residue of R398A system.

| Residue | S <sub>vdw</sub> | B <sub>vdw</sub> | T <sub>vdw</sub> | S <sub>ele</sub> | B <sub>ele</sub> | T <sub>ele</sub> | S <sub>polor</sub> | B <sub>polor</sub> | T <sub>polor</sub> | T <sub>nonpolor</sub> | T <sub>GBTOT</sub> |
|---------|------------------|------------------|------------------|------------------|------------------|------------------|--------------------|--------------------|--------------------|-----------------------|--------------------|
| R398A   |                  |                  |                  |                  |                  |                  |                    |                    |                    |                       |                    |
| 106     | -2.13            | -0.49            | -2.62            | -5.97            | 4.81             | -1.17            | 5.97               | -4.56              | 1.41               | -0.34                 | -2.72              |
| 110     | -0.72            | -0.71            | -1.43            | -3.12            | 1.69             | -1.44            | 3.35               | -1.61              | 1.74               | -0.11                 | -1.23              |
| 113     | -1.73            | -0.9             | -2.63            | -3.83            | 3.78             | -0.05            | 4.4                | -3.15              | 1.26               | -0.53                 | -1.95              |
| 114     | -2.03            | -0.55            | -2.58            | -3.82            | 1.52             | -2.3             | 4.36               | -1.21              | 3.14               | -0.39                 | -2.12              |
| 119     | -1.43            | -0.2             | -1.63            | -3.01            | -3.43            | -6.44            | 3.12               | 3.4                | 6.52               | -0.19                 | -1.74              |
| 121     | -0.49            | -0.72            | -1.21            | -5.78            | -3.28            | -9.06            | 5.55               | 0.86               | 6.41               | -0.01                 | -3.86              |
| 122     | -3.27            | -1.07            | -4.34            | -153.24          | 0.3              | -152.94          | 145.92             | -2.59              | 143.34             | -1.06                 | -15                |
| 123     | -1.34            | -0.78            | -2.12            | -13.59           | -1.74            | -15.33           | 12.04              | -0.46              | 11.58              | -0.48                 | -6.35              |
| 124     | -0.54            | -0.48            | -1.02            | -11.09           | -1.79            | -12.88           | 9.83               | 1.69               | 11.52              | -0.19                 | -2.58              |
| 125     | -1.43            | -0.26            | -1.69            | -75.61           | -0.62            | -76.23           | 74.41              | 0.75               | 75.15              | -0.42                 | -3.19              |
| 127     | -0.12            | -0.06            | -0.17            | -92.33           | -0.23            | -92.56           | 91.44              | 0.3                | 91.74              | 0                     | -0.99              |
| 169     | -1.53            | -0.59            | -2.12            | -2.67            | 0.34             | -2.33            | 3.57               | 0.43               | 4                  | -0.61                 | -1.06              |
| 189     | -1.09            | -0.68            | -1.77            | -5.1             | 4.32             | -0.77            | 4.94               | -3.94              | 1                  | -0.22                 | -1.76              |
| 190     | -0.78            | -0.74            | -1.52            | -23.27           | -0.52            | -23.79           | 23.41              | 0.82               | 24.23              | -0.53                 | -1.61              |
| 203     | 0.07             | -0.11            | -0.04            | -82.07           | 0.56             | -81.51           | 76.83              | -0.54              | 76.29              | -0.35                 | -5.62              |
| 277     | -3.84            | -0.5             | -4.33            | -2.29            | -1.52            | -3.81            | 2.4                | 1.74               | 4.14               | -0.83                 | -4.83              |
| 278     | -0.86            | -0.3             | -1.16            | -38.7            | -0.63            | -39.33           | 33.5               | 0.77               | 34.26              | -0.46                 | -6.69              |
| 281     | -0.12            | -0.06            | -0.18            | -29.92           | -0.66            | -30.58           | 27.29              | 0.68               | 27.96              | -0.1                  | -2.9               |
| 318     | -4.23            | -0.72            | -4.95            | -0.94            | -0.49            | -1.43            | 1.55               | 1.08               | 2.63               | -1.1                  | -4.85              |
| 357     | -3.72            | -0.74            | -4.46            | -1.83            | 0.53             | -1.3             | 3.67               | -0.79              | 2.88               | -0.8                  | -3.68              |
| 359     | -1.25            | -0.73            | -1.97            | 3.27             | -3.28            | -0.01            | -3.1               | 3.58               | 0.47               | -0.2                  | -1.72              |
| 360     | -1.38            | -1.08            | -2.46            | -67.58           | -5.64            | -73.23           | 69.28              | 5.62               | 74.9               | -0.55                 | -1.33              |
| 361     | -0.45            | -0.29            | -0.74            | -18.48           | 0.15             | -18.33           | 15.7               | 0                  | 15.69              | -0.21                 | -3.59              |
| 363     | -0.34            | -0.29            | -0.63            | -68.37           | -2.95            | -71.32           | 67.46              | 3.03               | 70.49              | -0.38                 | -1.84              |
| 364     | -4.7             | -0.82            | -5.52            | -0.57            | -1.22            | -1.8             | 1.91               | 1.48               | 3.38               | -0.92                 | -4.86              |
| 368     | -1.1             | -0.54            | -1.64            | -1.62            | -1.97            | -3.59            | 2.3                | 2.18               | 4.47               | -0.23                 | -0.99              |

Supplemental Table 7. Decomposition of binding free energies on each residue of F484A system.

| Residue | S <sub>vdw</sub> | B <sub>vdw</sub> | T <sub>vdw</sub> | S <sub>ele</sub> | B <sub>ele</sub> | T <sub>ele</sub> | S <sub>polor</sub> | B <sub>polor</sub> | T <sub>polor</sub> | T <sub>nonpolor</sub> | T <sub>GBTOT</sub> |
|---------|------------------|------------------|------------------|------------------|------------------|------------------|--------------------|--------------------|--------------------|-----------------------|--------------------|
| F484A   |                  |                  |                  |                  |                  |                  |                    |                    |                    |                       |                    |
| 106     | -1.74            | -0.27            | -2.01            | -4.02            | 3.74             | -0.28            | 4.02               | -3.58              | 0.44               | -0.34                 | -2.18              |
| 113     | -2.62            | -1.62            | -4.24            | -2.59            | 4.48             | 1.9              | 3.52               | -3.47              | 0.05               | -0.73                 | -3.02              |
| 114     | -1.32            | -0.79            | -2.11            | -4.74            | 0.61             | -4.13            | 4.95               | -0.4               | 4.55               | -0.28                 | -1.97              |
| 119     | -2.3             | -0.09            | -2.39            | -1.5             | -2.01            | -3.51            | 2.05               | 2                  | 4.05               | -0.42                 | -2.27              |
| 121     | -0.9             | -0.54            | -1.44            | -5.24            | -2.26            | -7.49            | 5.11               | 0.29               | 5.4                | -0.03                 | -3.57              |
| 122     | -0.84            | -0.3             | -1.15            | -137.27          | -4.33            | -141.59          | 123.61             | 1.18               | 124.79             | -0.63                 | -18.58             |
| 123     | -0.6             | -0.19            | -0.79            | -12.55           | -1.58            | -14.13           | 10.41              | -0.56              | 9.85               | -0.45                 | -5.52              |
| 125     | -1.97            | -0.24            | -2.22            | -44.33           | -0.23            | -44.55           | 44.62              | 0.35               | 44.96              | -0.43                 | -2.24              |
| 169     | -1.98            | -1.28            | -3.26            | -5.36            | -1.15            | -6.51            | 5.26               | 2.27               | 7.53               | -0.83                 | -3.08              |
| 170     | -1.82            | -1.44            | -3.26            | -1.49            | -2.48            | -3.97            | 3.1                | 2.29               | 5.4                | -0.46                 | -2.29              |
| 189     | -2.05            | -0.73            | -2.77            | -2.24            | 2.06             | -0.18            | 2.22               | -1.83              | 0.39               | -0.32                 | -2.88              |
| 203     | 0.14             | -0.06            | 0.08             | -75.37           | 0.2              | -75.17           | 70.44              | -0.17              | 70.27              | -0.28                 | -5.1               |
| 277     | -3.16            | -0.67            | -3.82            | -1.41            | -1               | -2.41            | 1.59               | 1.32               | 2.91               | -0.53                 | -3.86              |
| 278     | -0.23            | -0.17            | -0.4             | -39.17           | -0.32            | -39.49           | 34.22              | 0.39               | 34.61              | -0.29                 | -5.58              |
| 280     | -0.49            | -0.07            | -0.55            | -18.28           | -0.82            | -19.1            | 15.99              | 0.84               | 16.83              | -0.22                 | -3.05              |
| 281     | -0.23            | -0.05            | -0.28            | -21.21           | -0.77            | -21.98           | 20.61              | 0.77               | 21.38              | -0.06                 | -0.94              |
| 316     | -0.63            | -1.06            | -1.69            | -6.13            | 1.3              | -4.83            | 5.69               | -0.31              | 5.38               | -0.3                  | -1.45              |
| 317     | -1.37            | -1.03            | -2.41            | -2.16            | -0.85            | -3.01            | 2                  | 0.83               | 2.83               | -0.25                 | -2.84              |
| 318     | -4.39            | -1.75            | -6.13            | -1.68            | -0.99            | -2.67            | 2.12               | 1.4                | 3.53               | -1.09                 | -6.37              |
| 357     | -2.73            | -0.75            | -3.48            | -0.19            | 1.31             | 1.12             | 0.95               | -0.67              | 0.28               | -0.71                 | -2.8               |
| 359     | -1.42            | -0.72            | -2.14            | 3.31             | -3.18            | 0.13             | -3.18              | 3.41               | 0.23               | -0.29                 | -2.07              |
| 360     | -0.37            | -1.46            | -1.83            | -80.01           | -5.12            | -85.13           | 75.29              | 5.46               | 80.74              | -0.83                 | -7.05              |
| 361     | -0.96            | -0.69            | -1.65            | -18.45           | 0.86             | -17.59           | 15.64              | -0.63              | 15.02              | -0.31                 | -4.54              |
| 363     | -0.38            | -0.6             | -0.97            | -53.34           | -1.98            | -55.32           | 52.69              | 2.19               | 54.88              | -0.37                 | -1.77              |
| 364     | -1               | -1.46            | -2.45            | -0.32            | -0.62            | -0.93            | 0.34               | 1.01               | 1.35               | -0.4                  | -2.43              |
| 367     | -0.8             | -0.95            | -1.75            | 0.66             | -3.32            | -2.66            | 0.12               | 3.68               | 3.8                | -0.36                 | -0.97              |
| 368     | -1.18            | -0.66            | -1.84            | -1.31            | -2.27            | -3.58            | 2.03               | 2.26               | 4.29               | -0.19                 | -1.31              |

Supplemental Table 8. Decomposition of binding free energies on each residue of Y477A system.

| Residue | S <sub>vdw</sub> | B <sub>vdw</sub> | T <sub>vdw</sub> | S <sub>ele</sub> | B <sub>ele</sub> | T <sub>ele</sub> | S <sub>polor</sub> | B <sub>polor</sub> | T <sub>polor</sub> | T <sub>nonpolor</sub> | T <sub>GBTOT</sub> |
|---------|------------------|------------------|------------------|------------------|------------------|------------------|--------------------|--------------------|--------------------|-----------------------|--------------------|
| Y477A   |                  |                  |                  |                  |                  |                  |                    |                    |                    |                       |                    |
| 106     | -2.42            | -0.58            | -3               | -4.85            | 4.63             | -0.22            | 4.87               | -4.33              | 0.53               | -0.39                 | -3.08              |
| 110     | -0.81            | -0.92            | -1.72            | -3.62            | 1.97             | -1.65            | 3.87               | -1.92              | 1.95               | -0.09                 | -1.51              |
| 113     | -1.89            | -0.85            | -2.74            | -2.5             | 3.6              | 1.1              | 3.25               | -2.98              | 0.26               | -0.43                 | -1.81              |
| 114     | -1.64            | -0.54            | -2.18            | -5.51            | 1.16             | -4.35            | 6.06               | -0.98              | 5.08               | -0.34                 | -1.79              |
| 119     | -1.66            | -0.28            | -1.94            | -2.54            | -4.7             | -7.23            | 2.81               | 4.45               | 7.26               | -0.24                 | -2.15              |
| 121     | -0.52            | -0.74            | -1.26            | -5.84            | -4.66            | -10.5            | 5.61               | 1.83               | 7.44               | -0.01                 | -4.34              |
| 122     | -2.75            | -1.08            | -3.83            | -159.08          | -0.3             | -159.38          | 149.95             | -1.38              | 148.57             | -1.14                 | -15.78             |
| 123     | -1.67            | -1.12            | -2.79            | -14.28           | -2.28            | -16.56           | 12.25              | -0.22              | 12.03              | -0.52                 | -7.84              |
| 124     | -0.61            | -0.61            | -1.22            | -8.96            | -1.48            | -10.44           | 8.41               | 1.67               | 10.08              | -0.14                 | -1.72              |
| 125     | -1.36            | -0.52            | -1.88            | -89.54           | -1.08            | -90.62           | 87.47              | 1                  | 88.47              | -0.38                 | -4.42              |
| 169     | -1.57            | -0.02            | -1.59            | -4.5             | -8.43            | -12.93           | 4.97               | 5.82               | 10.78              | -0.5                  | -4.24              |
| 170     | -2.38            | -1.29            | -3.66            | -12.46           | -1.61            | -14.07           | 10.61              | 2.18               | 12.79              | -0.71                 | -5.65              |
| 171     | -1.47            | -0.33            | -1.81            | -4.33            | 0.22             | -4.11            | 4.57               | -0.08              | 4.49               | -0.22                 | -1.65              |
| 189     | -1.3             | -0.93            | -2.24            | -0.89            | 0.02             | -0.87            | 0.74               | 0.59               | 1.33               | -0.28                 | -2.06              |
| 190     | -0.81            | -0.57            | -1.37            | -29.09           | 1.02             | -28.07           | 29.32              | -0.67              | 28.65              | -0.45                 | -1.24              |
| 277     | -3.93            | -0.46            | -4.39            | -2.25            | -1.36            | -3.6             | 2.43               | 1.49               | 3.92               | -0.63                 | -4.7               |
| 278     | -0.81            | -0.26            | -1.07            | -25.33           | -0.38            | -25.71           | 21.41              | 0.48               | 21.89              | -0.43                 | -5.32              |
| 280     | -0.82            | -0.06            | -0.88            | -33.35           | -1.01            | -34.36           | 30.36              | 1.03               | 31.39              | -0.32                 | -4.17              |
| 281     | -0.09            | -0.06            | -0.15            | -31.32           | -0.85            | -32.17           | 28.39              | 0.86               | 29.26              | -0.13                 | -3.19              |
| 316     | -1.88            | -1.24            | -3.12            | -0.38            | -1.37            | -1.75            | 0.62               | 1.63               | 2.25               | -0.51                 | -3.13              |
| 317     | -0.79            | -0.9             | -1.68            | -1.69            | -2.03            | -3.72            | 1.73               | 2.55               | 4.28               | -0.13                 | -1.25              |
| 318     | -4.11            | -0.77            | -4.88            | -0.14            | -2.54            | -2.68            | 0.79               | 2.94               | 3.73               | -1.08                 | -4.9               |
| 354     | -1.56            | -1.36            | -2.91            | -40.15           | -7.34            | -47.48           | 41.48              | 7.77               | 49.25              | -0.47                 | -1.62              |
| 357     | -0.63            | -1.05            | -1.68            | -0.22            | -0.01            | -0.23            | 0.28               | -0.07              | 0.21               | -0.25                 | -1.96              |
| 359     | -1.52            | -0.67            | -2.19            | 3.35             | -4.67            | -1.32            | -3.25              | 4.62               | 1.37               | -0.22                 | -2.35              |
| 360     | -1.85            | -1.01            | -2.86            | -74.08           | -6.52            | -80.6            | 75.26              | 6.67               | 81.94              | -0.59                 | -2.12              |
| 361     | -1.24            | -0.45            | -1.69            | -14.69           | 0.29             | -14.39           | 12.99              | -0.12              | 12.88              | -0.2                  | -3.4               |
| 364     | -5.51            | -1.06            | -6.57            | -0.42            | -0.57            | -0.99            | 1.73               | 1.07               | 2.8                | -0.92                 | -5.68              |
| 385     | -1.18            | -0.17            | -1.34            | 0.35             | 1.84             | 2.19             | -0.24              | -1.61              | -1.85              | -0.13                 | -1.13              |
| 386     | 0                | 0                | 0                | 0                | -60.01           | -60.01           | 0                  | 59.05              | 59.05              | -0.21                 | -1.17              |

Supplemental Table 9. Decomposition of binding free energies on each residue of double mutant system.

| Residue       | S <sub>vdw</sub> | B <sub>vdw</sub> | T <sub>vdw</sub> | S <sub>ele</sub> | B <sub>ele</sub> | T <sub>ele</sub> | S <sub>polor</sub> | B <sub>polor</sub> | T <sub>polor</sub> | T <sub>nonpolor</sub> | T <sub>GBTOT</sub> |
|---------------|------------------|------------------|------------------|------------------|------------------|------------------|--------------------|--------------------|--------------------|-----------------------|--------------------|
| double mutant |                  |                  |                  |                  |                  |                  |                    |                    |                    |                       |                    |
| 106           | -2.65            | -0.7             | -3.35            | -6.28            | 5.93             | -0.35            | 6.41               | -5.52              | 0.88               | -0.42                 | -3.24              |
| 113           | -1.65            | -0.73            | -2.38            | -2.77            | 5.3              | 2.53             | 3.53               | -4.72              | -1.19              | -0.37                 | -1.41              |
| 114           | -1.2             | -0.42            | -1.62            | -5.58            | 2.66             | -2.91            | 5.88               | -2.41              | 3.47               | -0.3                  | -1.36              |
| 119           | -1.13            | -0.12            | -1.25            | -1.89            | -2.63            | -4.52            | 2.34               | 2.56               | 4.9                | -0.16                 | -1.03              |
| 121           | -0.58            | -0.66            | -1.25            | -5.96            | -0.65            | -6.61            | 5.76               | -1.63              | 4.13               | 0                     | -3.73              |
| 122           | -2.38            | -0.9             | -3.29            | -154.22          | -0.46            | -154.67          | 145.59             | -2.26              | 143.33             | -0.8                  | -15.43             |
| 123           | -1.25            | -0.7             | -1.95            | -13.93           | -1.45            | -15.38           | 12.15              | -0.8               | 11.34              | -0.45                 | -6.44              |
| 124           | -0.51            | -0.42            | -0.92            | -11.49           | -1.38            | -12.87           | 10.1               | 1.45               | 11.55              | -0.2                  | -2.45              |
| 125           | -1.63            | -0.28            | -1.91            | -77.12           | -0.29            | -77.42           | 76.35              | 0.45               | 76.8               | -0.39                 | -2.92              |
| 168           | -0.28            | -1.44            | -1.72            | -2.59            | -0.38            | -2.96            | 2.64               | 0.93               | 3.57               | -0.13                 | -1.24              |
| 169           | -3.21            | -1.68            | -4.89            | -4.88            | -0.25            | -5.14            | 7.13               | 1.33               | 8.46               | -0.93                 | -2.51              |
| 170           | -2.71            | -1.21            | -3.92            | -5.06            | -1.73            | -6.78            | 5.42               | 2.27               | 7.69               | -0.69                 | -3.71              |
| 171           | -1.85            | -0.38            | -2.23            | -4.47            | 1.77             | -2.71            | 5.28               | -1.47              | 3.81               | -0.29                 | -1.41              |
| 189           | -1.92            | -1.17            | -3.08            | -5.74            | 5.62             | -0.12            | 6.12               | -4.93              | 1.19               | -0.42                 | -2.43              |
| 190           | -0.42            | -0.8             | -1.21            | 9.03             | 3.83             | 12.86            | -10.07             | -3.54              | -13.62             | -0.33                 | -2.3               |
| 201           | -1.16            | -0.49            | -1.66            | -9.64            | 6.98             | -2.66            | 9.55               | -6.56              | 2.99               | -0.32                 | -1.65              |
| 203           | -0.57            | -0.21            | -0.78            | -81.58           | 1.04             | -80.54           | 79.12              | -0.97              | 78.15              | -0.32                 | -3.48              |
| 277           | -4.25            | -1.23            | -5.47            | -1.37            | -0.36            | -1.73            | 1.77               | 0.72               | 2.48               | -0.84                 | -5.56              |
| 278           | -0.59            | -1.25            | -1.84            | 0.02             | -0.17            | -0.15            | -0.07              | 0.6                | 0.53               | -0.3                  | -1.76              |
| 281           | -1.36            | -0.51            | -1.87            | -50.65           | -0.51            | -51.17           | 45.73              | 0.59               | 46.32              | -0.62                 | -7.33              |
| 314           | -0.45            | -0.52            | -0.97            | -0.53            | 0.9              | 0.37             | 0.51               | -0.84              | -0.33              | -0.07                 | -1.01              |
| 316           | -1.53            | -1.26            | -2.8             | -1.75            | -1.9             | -3.65            | 1.99               | 2.37               | 4.35               | -0.5                  | -2.59              |
| 317           | -1.28            | -1.11            | -2.4             | -1.38            | -1.81            | -3.19            | 1.42               | 2.39               | 3.81               | -0.27                 | -2.05              |
| 318           | -4.91            | -0.9             | -5.81            | -1.24            | -2.89            | -4.13            | 1.95               | 3.31               | 5.26               | -1.14                 | -5.82              |
| 357           | -3.82            | -0.91            | -4.73            | -6.24            | 0.53             | -5.72            | 7.42               | -0.65              | 6.77               | -0.91                 | -4.58              |
| 359           | -1.11            | -0.75            | -1.86            | 2.63             | -3.45            | -0.82            | -2.5               | 3.82               | 1.32               | -0.21                 | -1.58              |
| 361           | -0.93            | -0.39            | -1.32            | -14.24           | 0.62             | -13.63           | 12.39              | -0.41              | 11.98              | -0.19                 | -3.15              |
| 364           | -4.98            | -0.8             | -5.78            | -0.44            | -0.68            | -1.12            | 1.9                | 0.93               | 2.83               | -0.89                 | -4.96              |



Supplemental Table 10. Computational alanine scanning results in specific data (all values are given in kcal/mol).

|                               |                 |                  |                 |                  |                 |                 |                   |
|-------------------------------|-----------------|------------------|-----------------|------------------|-----------------|-----------------|-------------------|
|                               | L121A           | W125A            | T128A           | T129A            | T131A           | F134A           | M136A             |
| $\Delta\Delta G_{binding}/GB$ | $2.26 \pm 1.87$ | $0.60 \pm 0.84$  | $0.47 \pm 0.70$ | $0.22 \pm 0.42$  | $0.16 \pm 0.25$ | $0.68 \pm 0.92$ | $0.886 \pm 0.16$  |
|                               | R137A           | T138A            | Q139A           | R140A            | V141A           | Q184A           | N185A             |
| $\Delta\Delta G_{binding}/GB$ | $6.10 \pm 8.62$ | $4.8 \pm 1.74$   | $0.10 \pm 0.28$ | $2.87 \pm 1.22$  | $0.62 \pm 0.24$ | $1.04 \pm 0.70$ | $0.0005 \pm 0.52$ |
|                               | H186A           | L201A            | D205A           | K218A            |                 |                 |                   |
| $\Delta\Delta G_{binding}/GB$ | $0.71 \pm 1.02$ | $0.012 \pm 0.21$ | $1.72 \pm 2.02$ | $0.28 \pm 0.50$  |                 |                 |                   |
|                               | F395A           | R396A            | R398A           | K427A            | T434A           | V435A           | M436A             |
| $\Delta\Delta G_{binding}/GB$ | $2.10 \pm 2.02$ | $2.51 \pm 2.58$  | $4.40 \pm 1.70$ | $0.21 \pm 1.54$  | $1.00 \pm 1.62$ | $0.20 \pm 0.66$ | $1.88 \pm 0.82$   |
|                               | D437A           | S438A            | Y477A           | L479A            | D480A           | E483A           | F484A             |
| $\Delta\Delta G_{binding}/GB$ | $0.20 \pm 0.75$ | $0.50 \pm 0.46$  | $4.71 \pm 1.22$ | $0.042 \pm 0.40$ | $2.82 \pm 1.68$ | $2.27 \pm 0.64$ | $2.22 \pm 1.41$   |
|                               | F485A           |                  |                 |                  |                 |                 |                   |
| $\Delta\Delta G_{binding}/GB$ | $1.22 \pm 0.76$ |                  |                 |                  |                 |                 |                   |

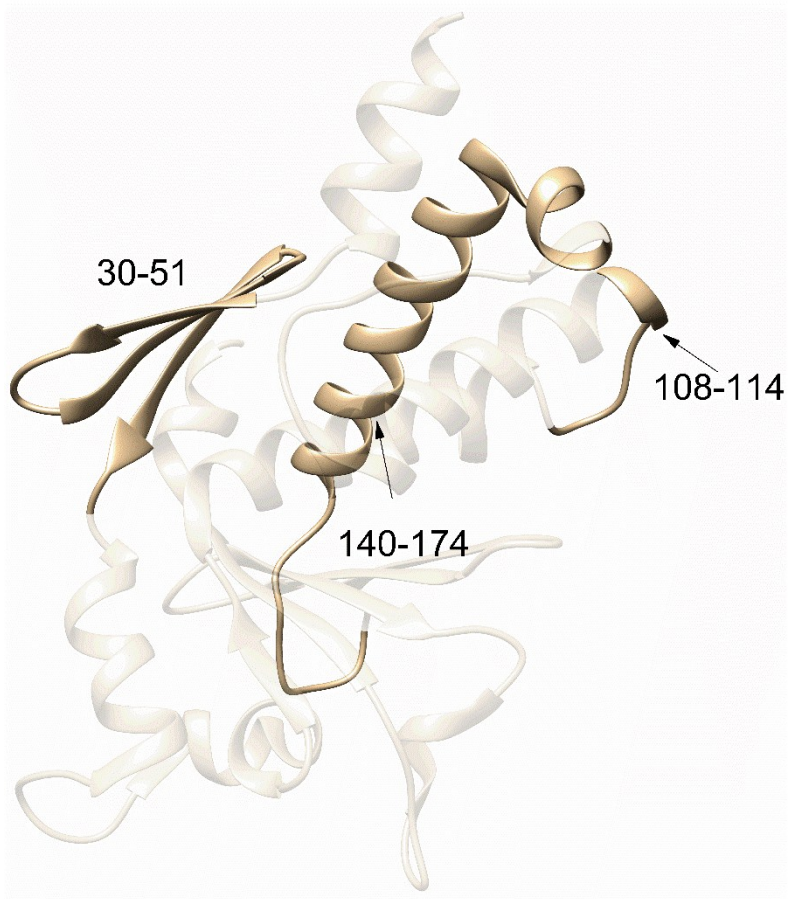

Supplemental Figure 1. Residues located in the external regions of VP24

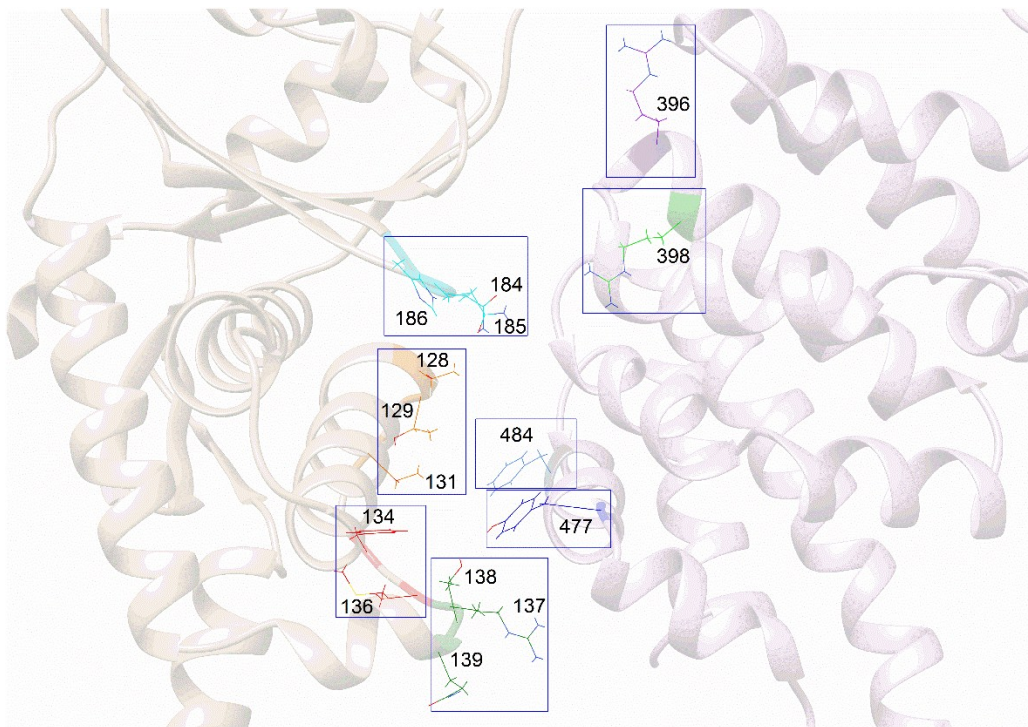

Supplemental Figure 2. Tertiary structure of the complex and the exact location of all mutated residues.
